# Supplementary material
Source: PubMed Central journal article supplement (PMC4709013)

## A Neurexin-1 $\beta$

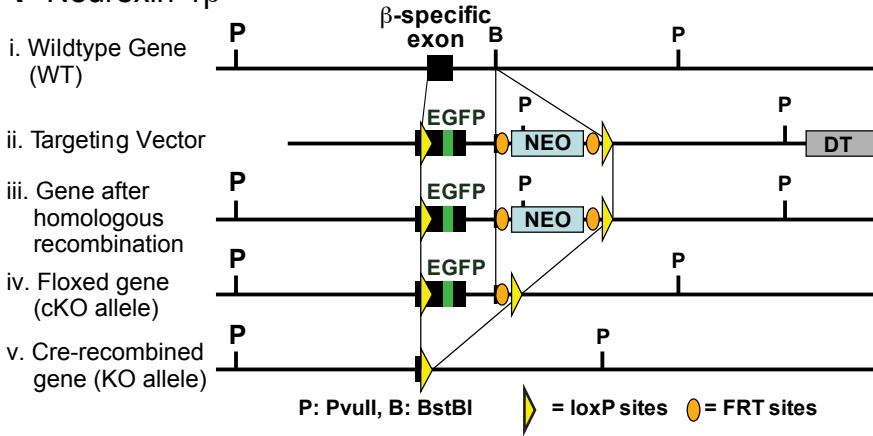

## B Neurexin-2 $\beta$

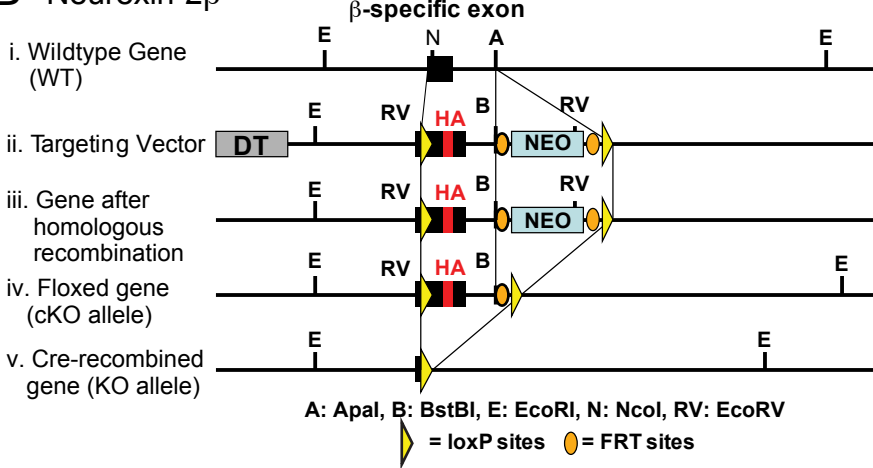

## C Neurexin-3 $\beta$

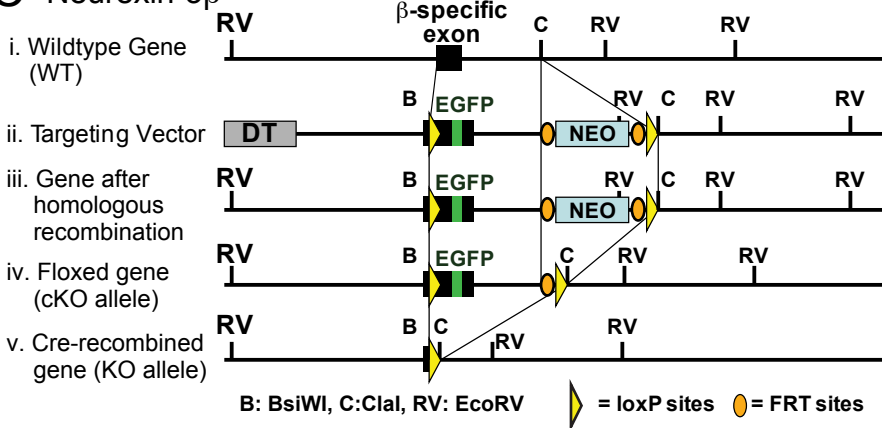

## D

mRNA Measurements (NBF = triple  $\beta$ -neurexin cKO before Cre-mediated excision of first coding exon)

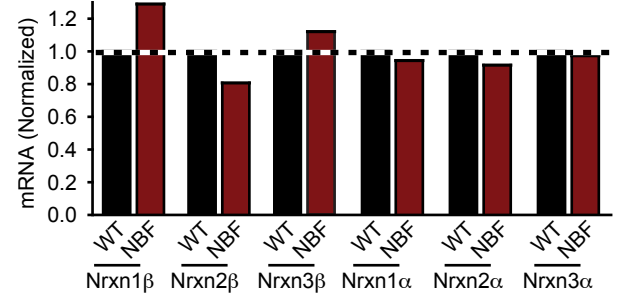

## E

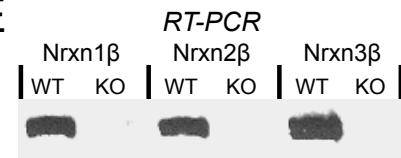

## F

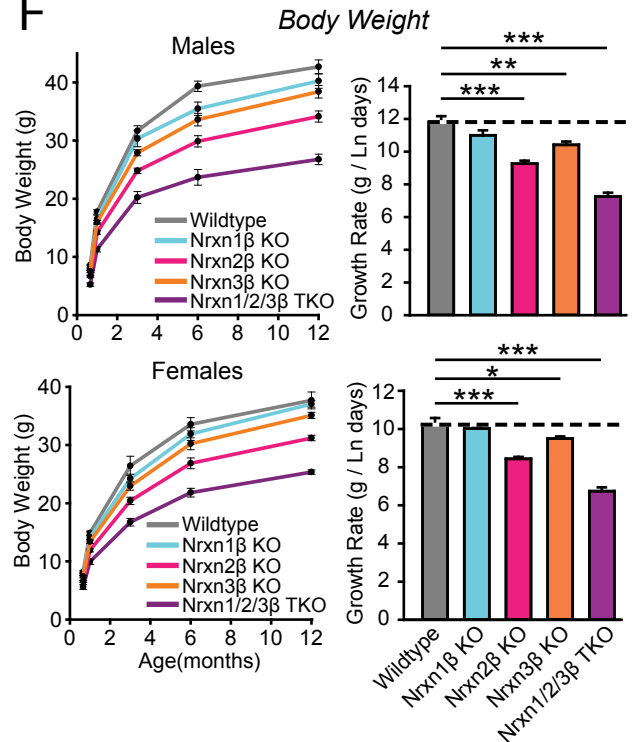

Supplement: NIHMS710517-supplement-2.pdf [file NIHMS710517-supplement-2.pdf]
