# Supplementary material
Source: PubMed Central journal article supplement (PMC4709013)

**A** Comparing Regular Firing vs. Burst Firing Subiculum Neurons - CB1-Receptor Activation

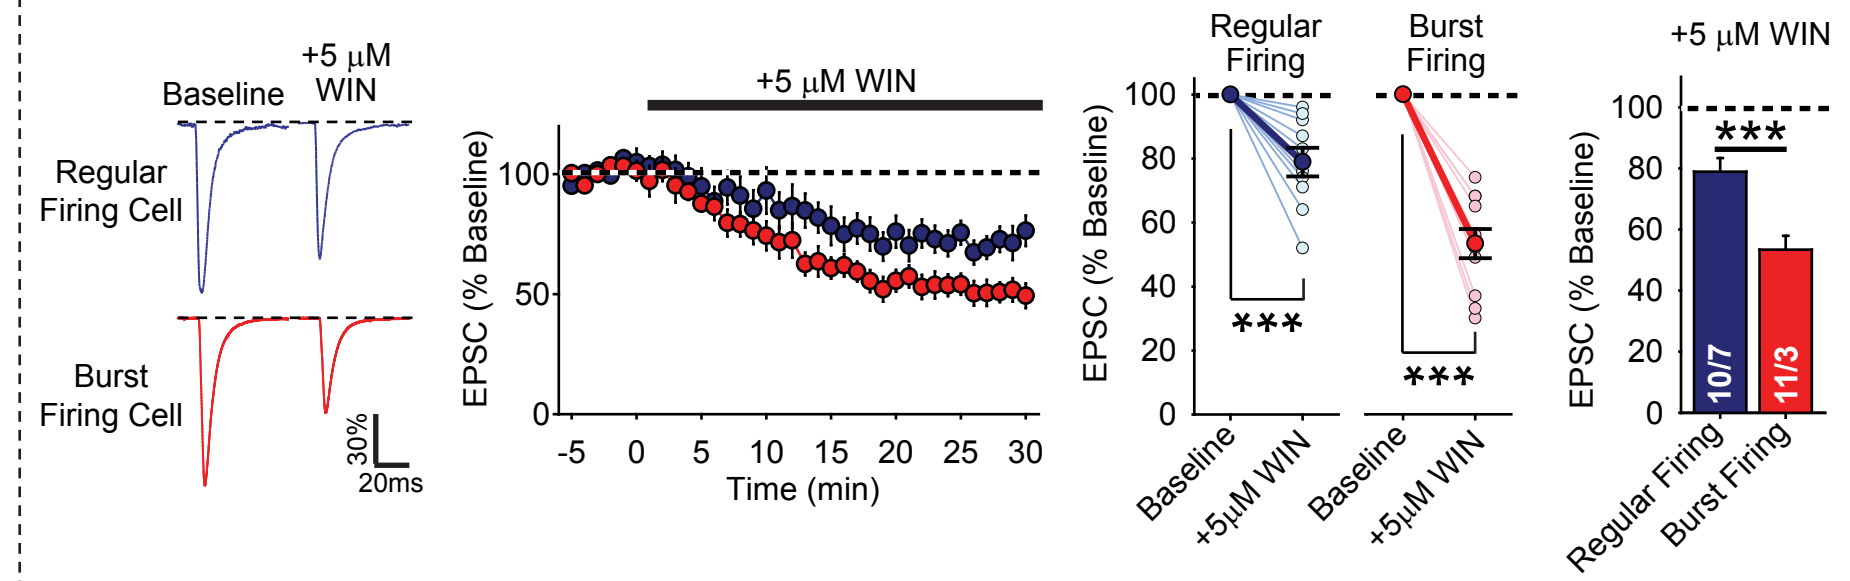

**B** β-Neurexin KO Effect on Burst Firing Subiculum Neurons - CB1-Receptor Activation

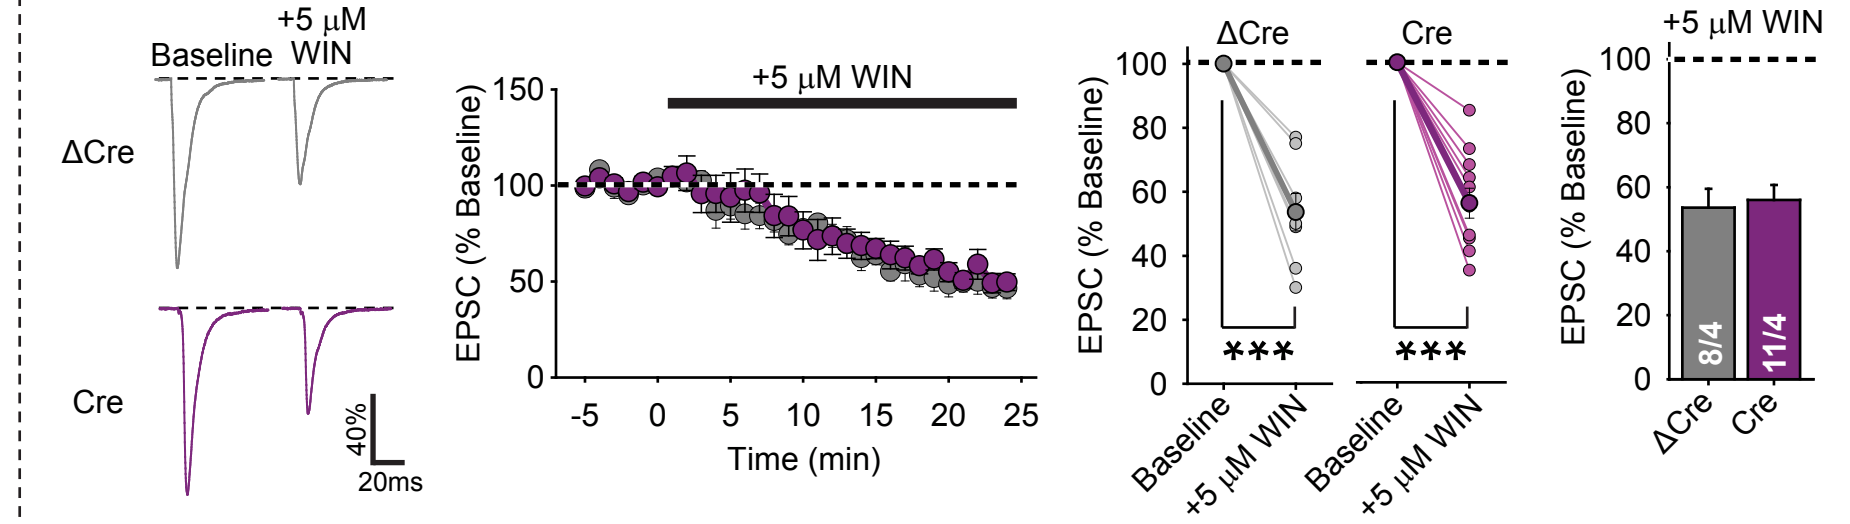

Supplement: NIHMS710517-supplement-6.pdf [file NIHMS710517-supplement-6.pdf]
