# Supplementary material
Source: PubMed Central journal article supplement (PMC4709013)

### QRT-PCR mRNA quantification

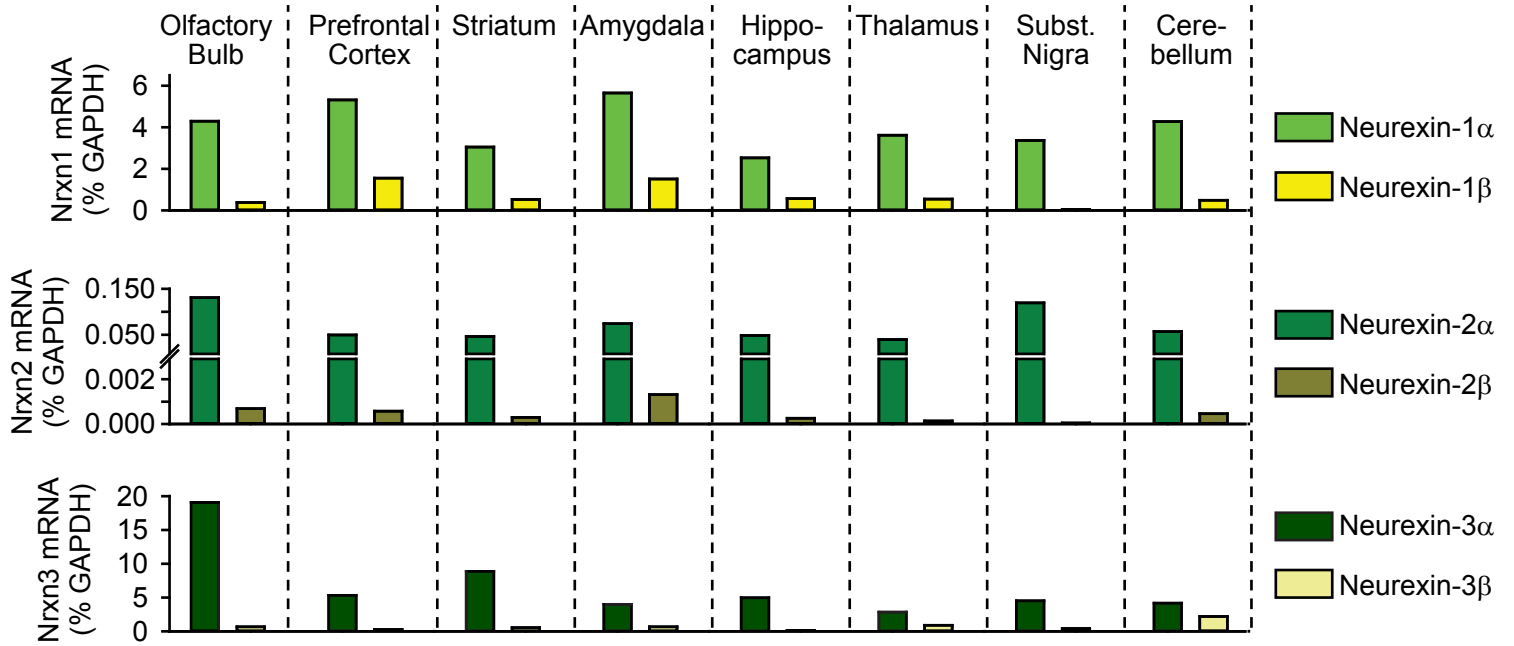

Supplement: NIHMS710517-supplement-1.pdf [file NIHMS710517-supplement-1.pdf]

**A**

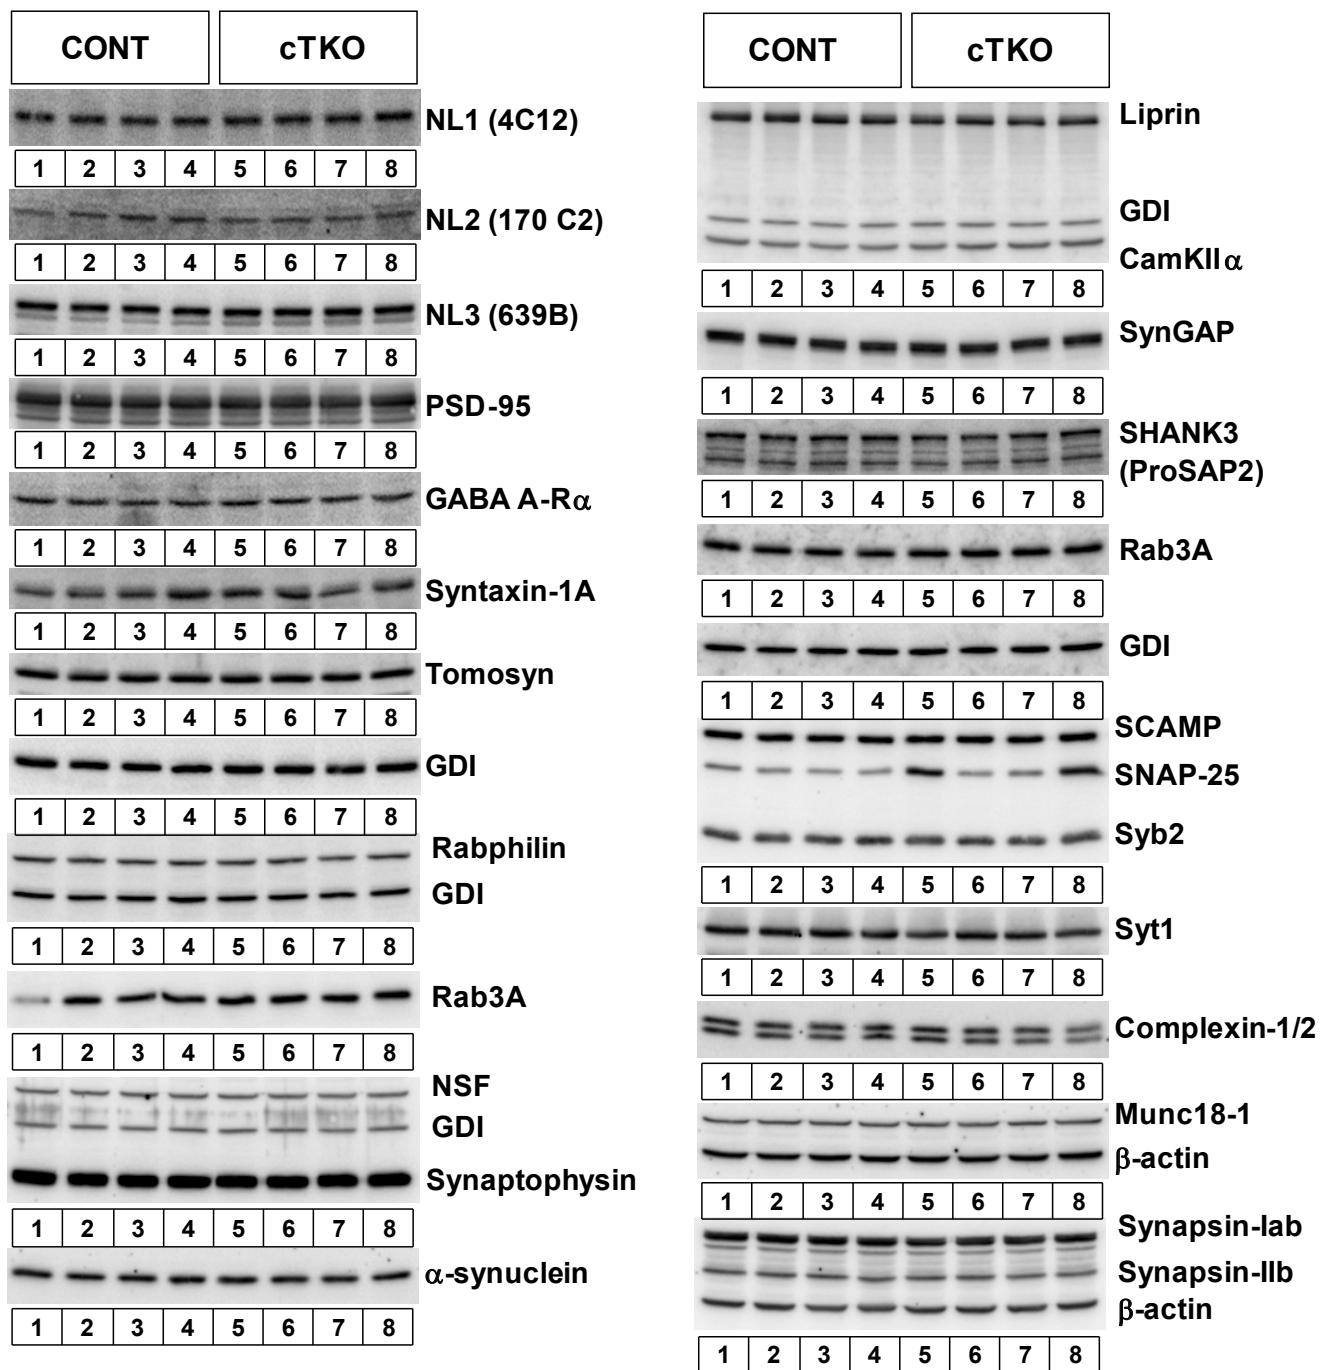

**B**

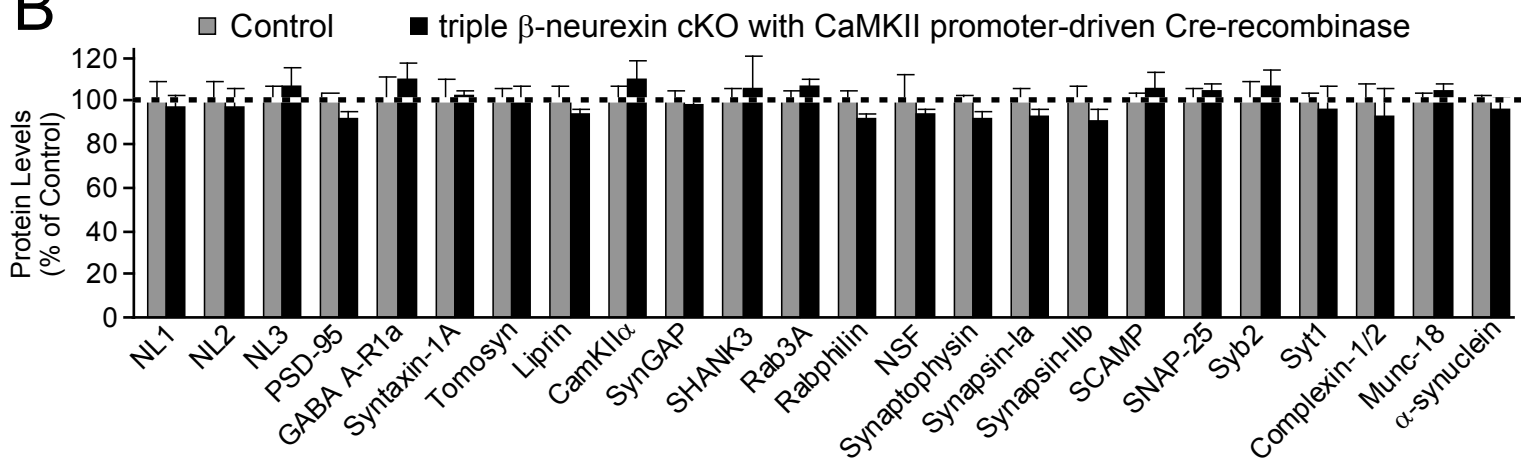

Supplement: NIHMS710517-supplement-3.pdf [file NIHMS710517-supplement-3.pdf]

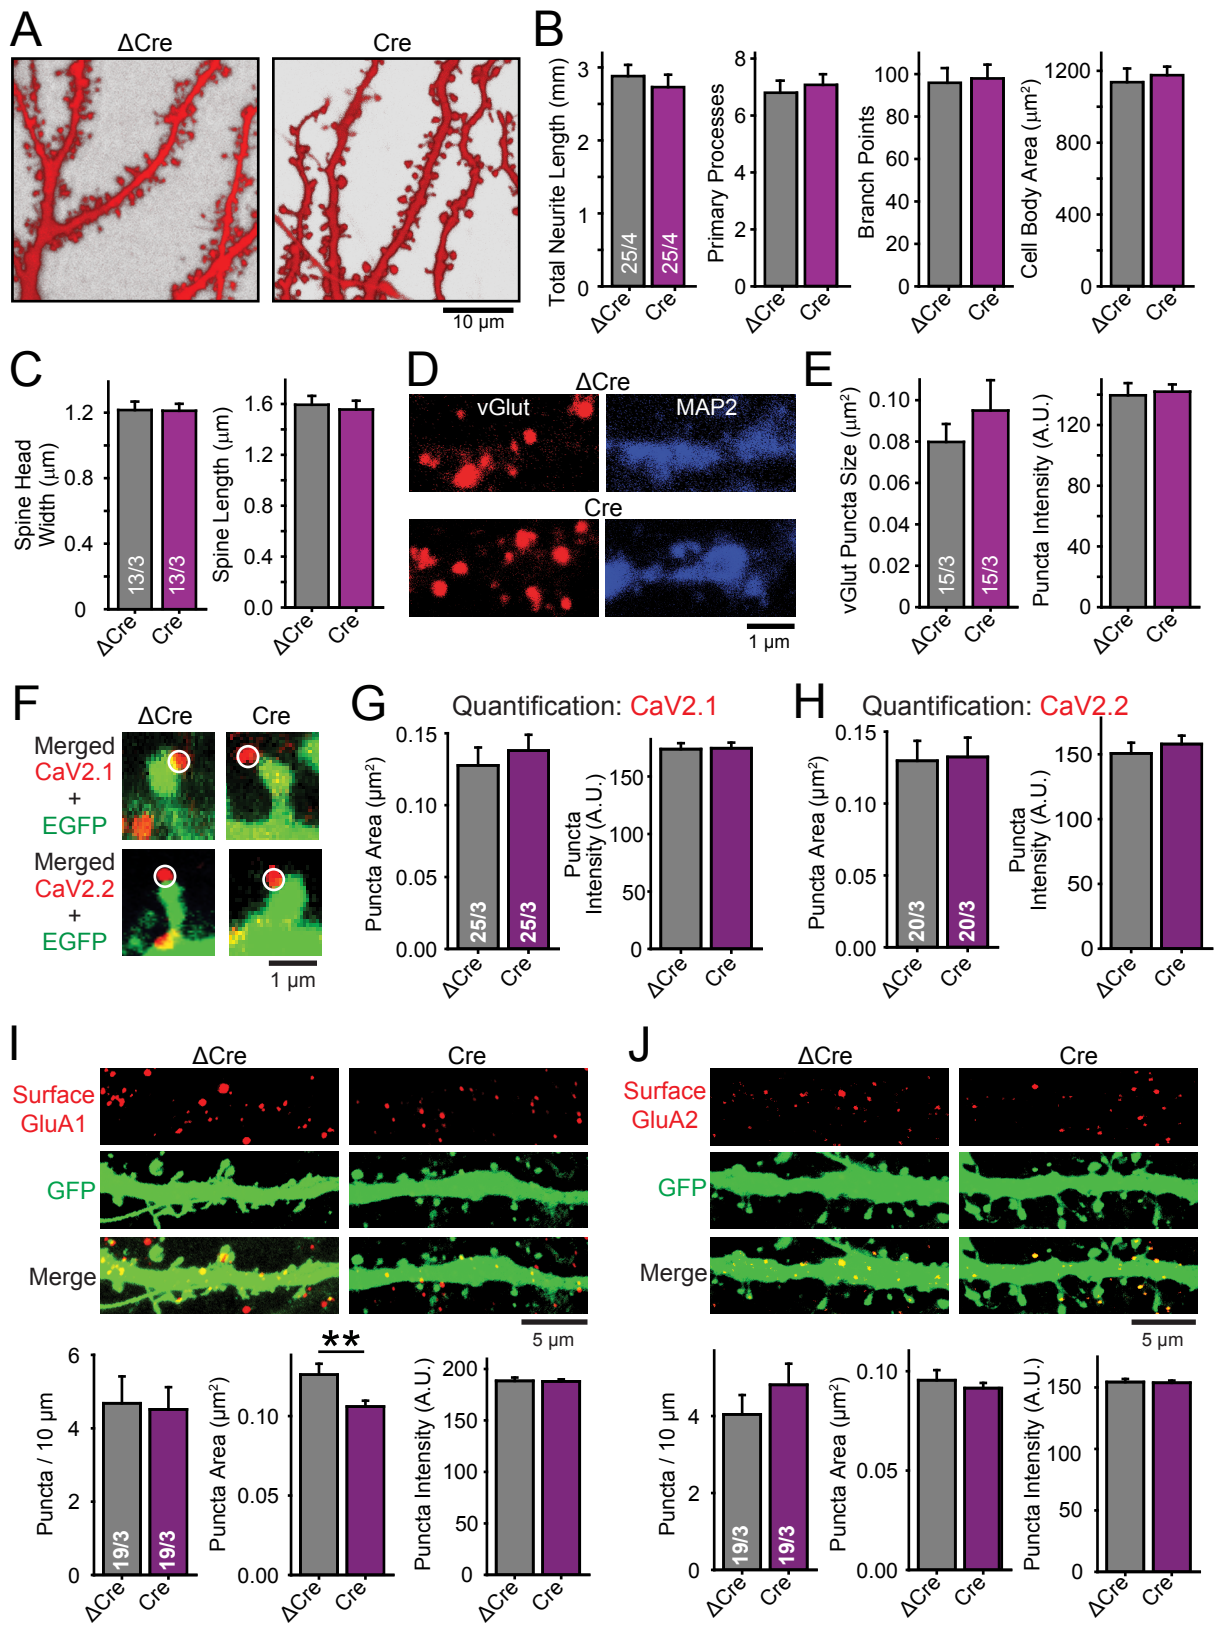

Supplement: NIHMS710517-supplement-4.pdf [file NIHMS710517-supplement-4.pdf]

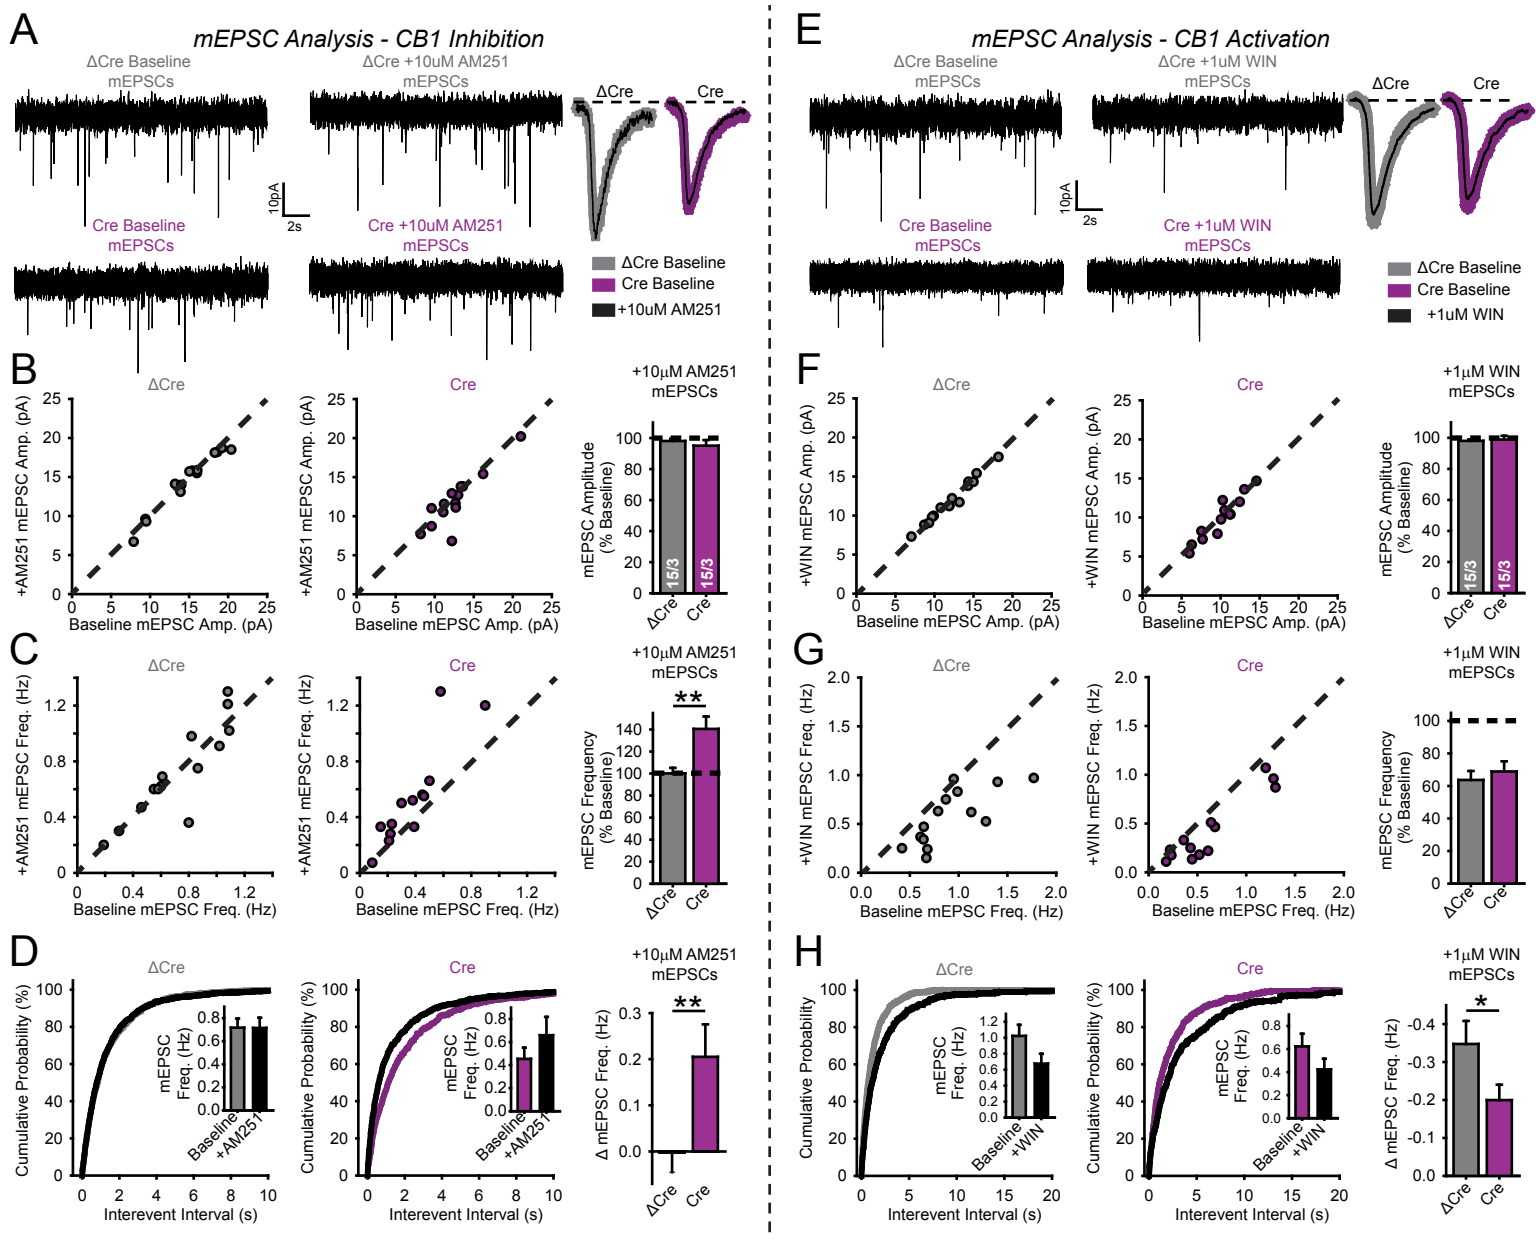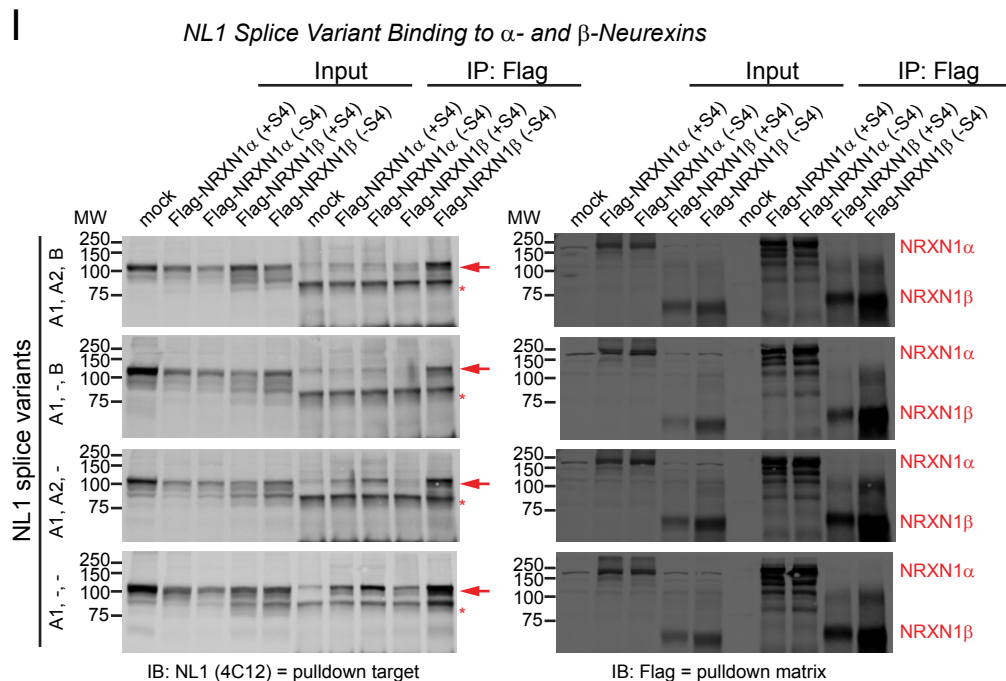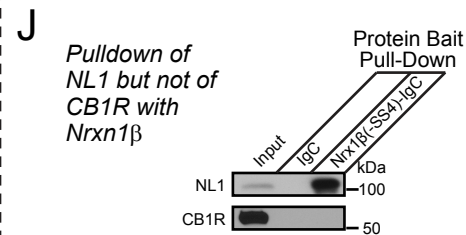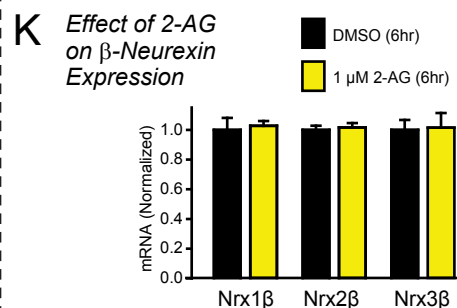

Supplement: NIHMS710517-supplement-5.pdf [file NIHMS710517-supplement-5.pdf]

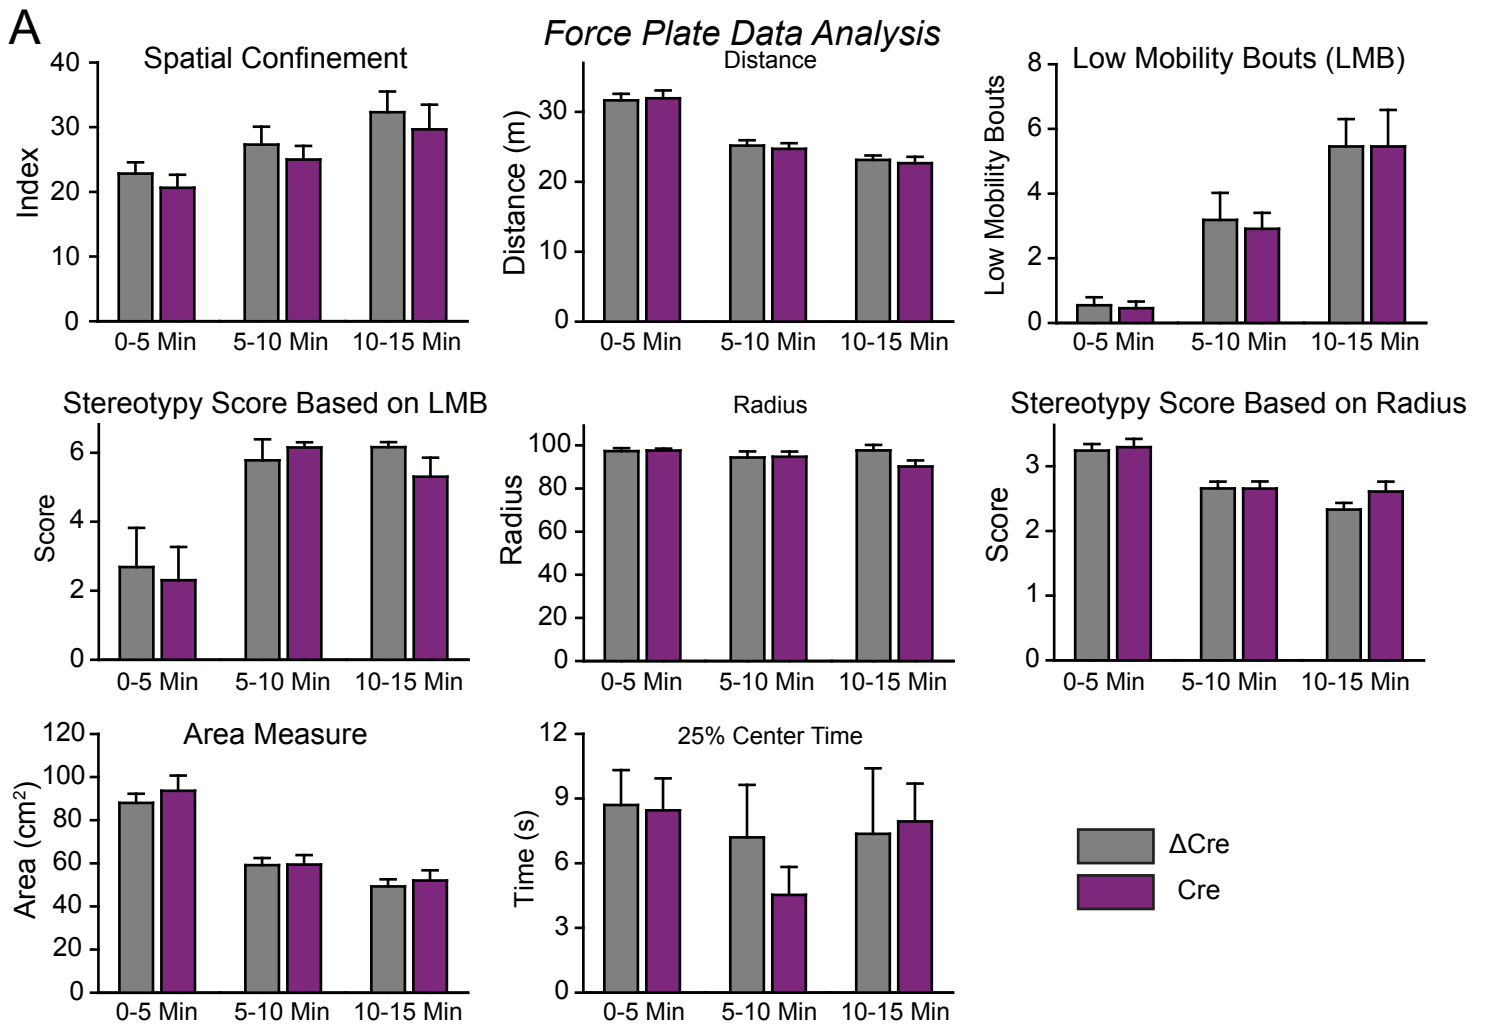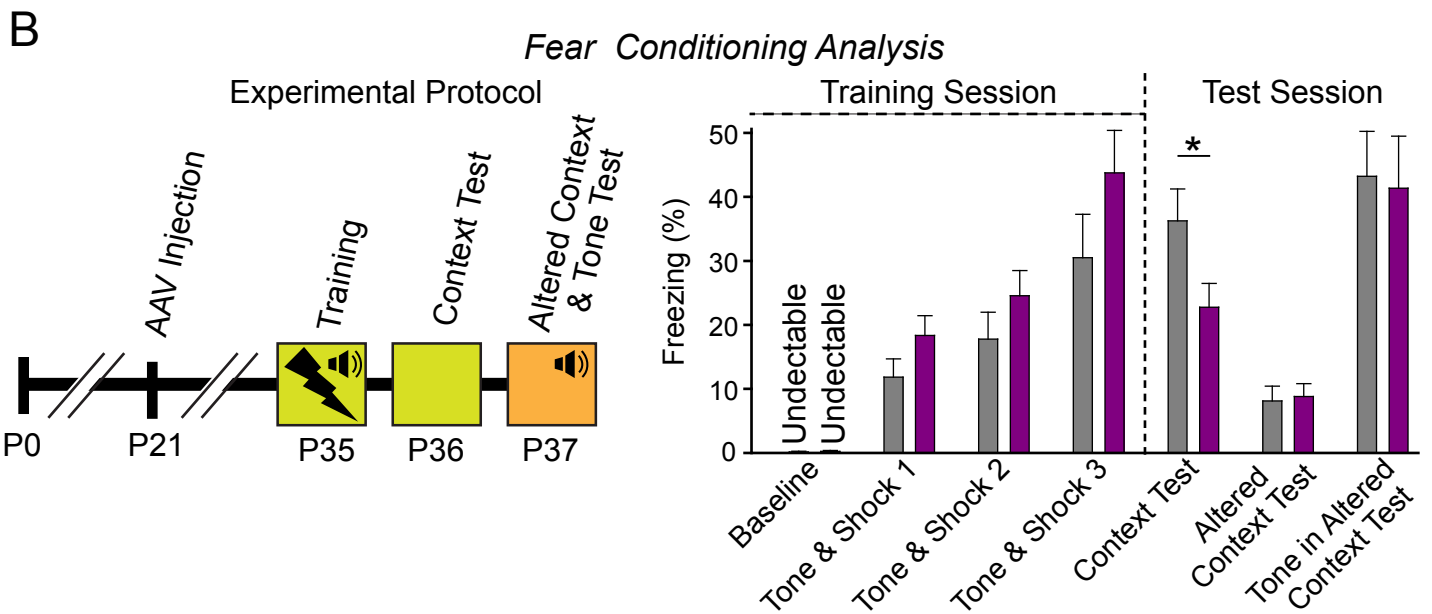

Supplement: NIHMS710517-supplement-7.pdf [file NIHMS710517-supplement-7.pdf]
